# Supplementary material for: Highly dispersed Pt nanoparticles supported on carbon nanotubes produced by atomic layer deposition for hydrogen generation from hydrolysis of ammonia borane
Source: Royal Society of Chemistry journal article supplement (doi:10.1039/c6cy01960a), 2016-10-31
Supplement: c6cy01960a1.pdf [file c6cy01960a1.pdf]

## Supporting Information

### **Highly dispersed Pt nanoparticles supported on carbon nanotubes produced by atomic layer deposition for hydrogen generation from hydrolysis of ammonia borane**

**Jiankang Zhang,<sup>a,b</sup> Chaoqiu Chen,<sup>a,\*</sup> Shuai Chen,<sup>a</sup> Qingmin Hu,<sup>a</sup> Zhe Gao,<sup>a</sup>**

**Yunqin Li,<sup>a,b</sup> Yong Qin<sup>a,\*</sup>**

<sup>a</sup> State Key Laboratory of Coal Conversion, Institute of Coal Chemistry, Chinese Academy of Sciences, Taiyuan 030001, P. R. China

<sup>b</sup> University of Chinese Academy of Sciences, Beijing 100039, P. R. China

---

\*Corresponding authors. +86 351 4040081.  
E-mail addresses: [chenchaoqiu@iccas.ac.cn](mailto:chenchaoqiu@iccas.ac.cn) and [qinyong@sxicc.ac.cn](mailto:qinyong@sxicc.ac.cn).

## 1. Calculation Methods of initial TOF and linear Rate

The calculation methods used in this work were taken from Ref. 7 and 18. For the conversion of reaction ( $x_c$ ), initial TOF and linear Rate, there are the following equations:

$$x_c = \frac{P_{atm} V_{H_2} / RT}{3n_{AB}}$$

$$TOF = \frac{P_{atm} V_{H_2} / RT}{n_{metal} t}$$

$$Linear - Rate = \frac{V_{H_2}}{t}$$

where  $P_{atm}$  is the atmospheric pressure,  $V_{H_2}$  is the generated gas volume,  $R$  is the universal gas constant,  $T$  is room temperature (298 K), and  $n_{metal}$  is the mole number of the metallic Pt metal, and  $t$  is the reaction time when  $x_c$  reaches about 35%; Initial rate of  $H_2$  evolution, linear Rate, equals the rate of  $H_2$  generation when  $x_c$  reaches 35%,  $t$  is the reaction time when  $x_c$  reaches about 35%.

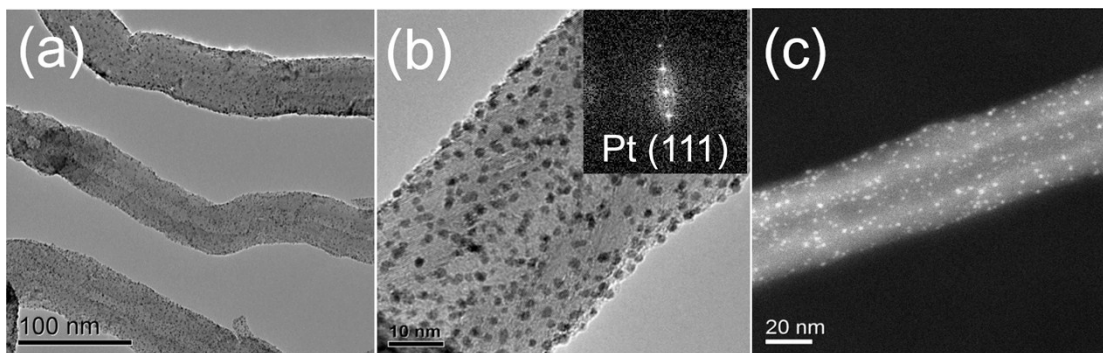

**Fig. S1** Low (a), high magnification (b) TEM images and representative (c) HAADF-STEM image of Pt20/CNTs catalysts. Inset in (b) is the FFT of single Pt nanoparticle for Pt20/CNTs catalysts.

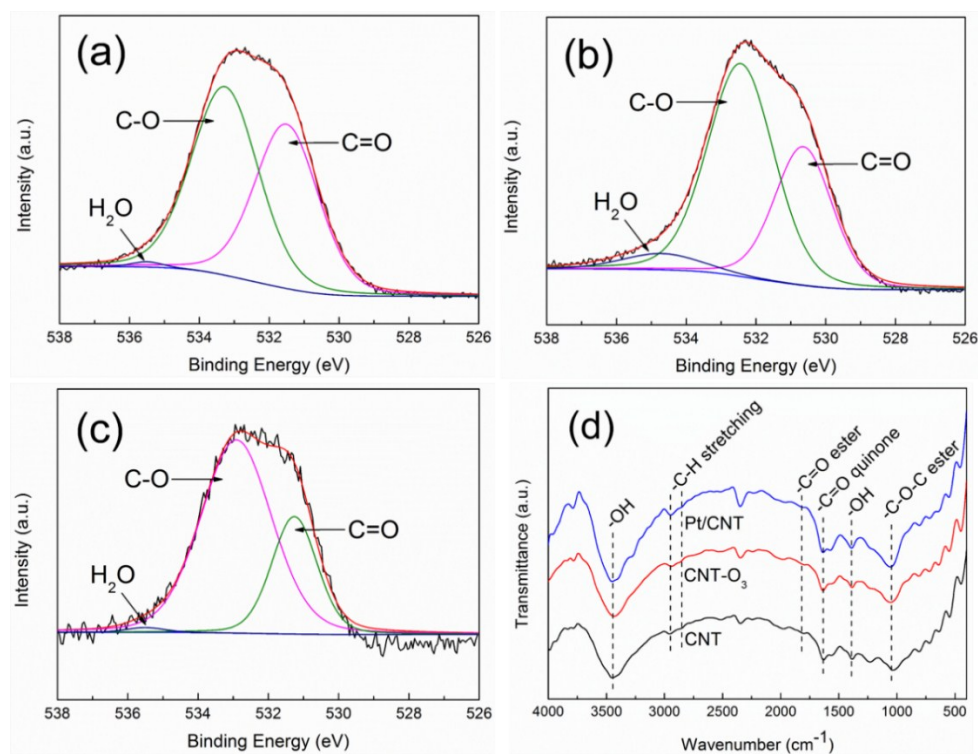

**Fig. S2** High-resolution XPS O1s of (a) CNTs, (b) O<sub>3</sub> pretreated CNTs (CNTs-O<sub>3</sub>) and (c) Pt20/CNTs samples. (d) FTIR spectra of CNTs, CNTs-O<sub>3</sub> and Pt20/CNTs samples.

**Table S1** Data comparison of XPS O1s deconvolution of the different samples.

| Sample              | Relative content (%) |      |                |
|---------------------|----------------------|------|----------------|
|                     | C=O                  | C-O  | Adsorbed water |
| CNTs                | 45.1                 | 54.2 | 0.7            |
| CNTs-O <sub>3</sub> | 34.3                 | 60.3 | 5.4            |
| Pt20/CNTs           | 27.8                 | 71.3 | 0.9            |

Both XPS O1s and FTIR confirm the existence of the oxygen-containing groups on CNT surface, as shown in Fig. S2a-d. The difference of oxygen-containing functional groups is not very obvious, and this is probably because that the pulse time (1 s) and exposure time (10 s) of O<sub>3</sub> to substrate (CNTs) is too short for Pt20/CNTs catalysts with 20 Pt ALD cycles.

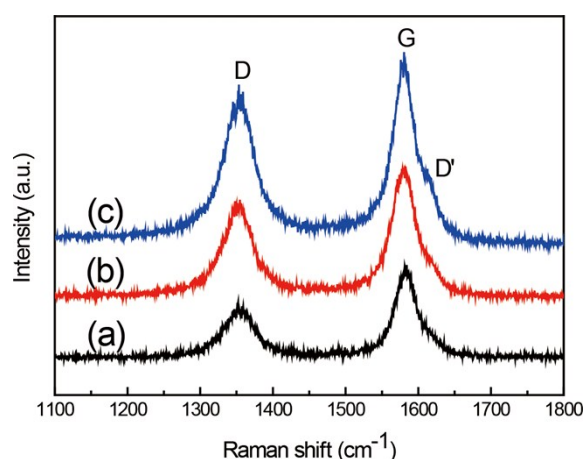

**Fig. S3** Raman spectra of (a) CNTs, (b) CNTs-O<sub>3</sub> and (c) Pt20/CNTs.

Generally, D band centered around 1352 cm<sup>-1</sup> and G band centered around 1579 cm<sup>-1</sup> in Raman spectra stand for disorder and graphite, which correspond to defect and graphite properties of CNTs. The D band is disorder induced features caused by lattice defect and is usually attributed to the presence of amorphous or disordered carbon in CNTs. While the G band reflects well-graphitized carbons in CNTs. The calculated I<sub>D</sub>/I<sub>G</sub> value is about 0.88, 0.95 and 1.07 respectively for CNTs, CNTs-O<sub>3</sub> (pretreated with O<sub>3</sub> without pulse of MeCpPtMe<sub>3</sub>) and Pt/CNTs samples. These results further confirm the existence of the oxygen-containing groups on CNT surface during the whole ALD process, which can act as active/anchoring sites for the MeCpPtMe<sub>3</sub> chemisorption, Pt nucleation and growth and finally results in a uniform dispersion of Pt nanoparticles on CNTs.

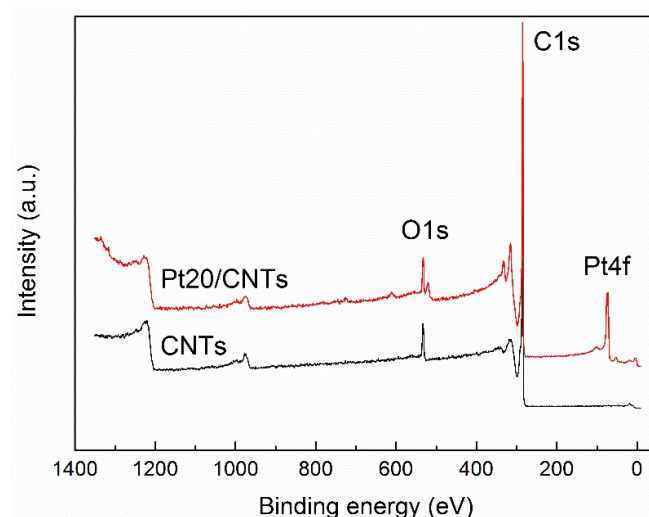

**Fig. S4** XPS survey spectra of CNTs and Pt20/CNTs samples.

**Table S2** Summary of XPS results for the Pt/CNTs catalysts with different Pt ALD cycle numbers.

| Catalysts | Relative content (%) | B.E. (eV) | Assignment               | $\Delta$ BE (eV) <sup>a</sup> |
|-----------|----------------------|-----------|--------------------------|-------------------------------|
| Pt10/CNTs | 41.3                 | 71.8      | Metallic Pt <sup>0</sup> | 0                             |
|           | 44.4                 | 72.8      | Pt <sup>2+</sup>         |                               |
|           | 14.3                 | 74.6      | Pt <sup>4+</sup>         |                               |
| Pt20/CNTs | 39.8                 | 71.5      | Metallic Pt <sup>0</sup> | 0.3                           |
|           | 39.5                 | 72.4      | Pt <sup>2+</sup>         |                               |
|           | 20.7                 | 74.1      | Pt <sup>4+</sup>         |                               |
| Pt40/CNTs | 40.5                 | 71.4      | Metallic Pt <sup>0</sup> | 0.6                           |
|           | 40.8                 | 72.2      | Pt <sup>2+</sup>         |                               |
|           | 18.7                 | 74.0      | Pt <sup>4+</sup>         |                               |

<sup>a</sup> The difference of the binding energy ( $\Delta$ BE) is calculated based the Pt10/CNTs catalysts.

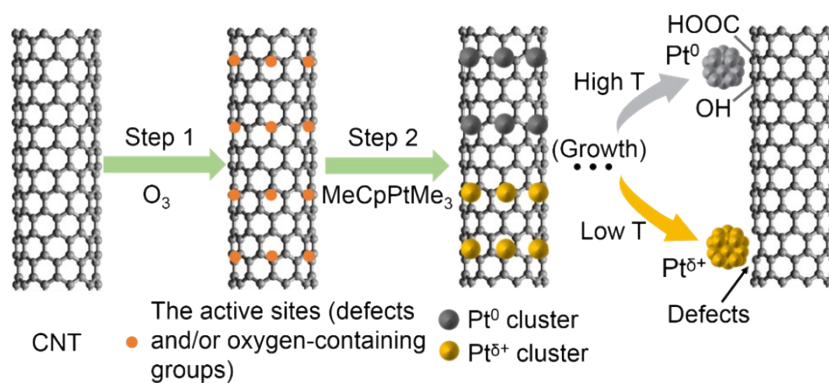

**Fig. S5** Possible ALD growth mechanism of Pt nanoparticles on CNTs.

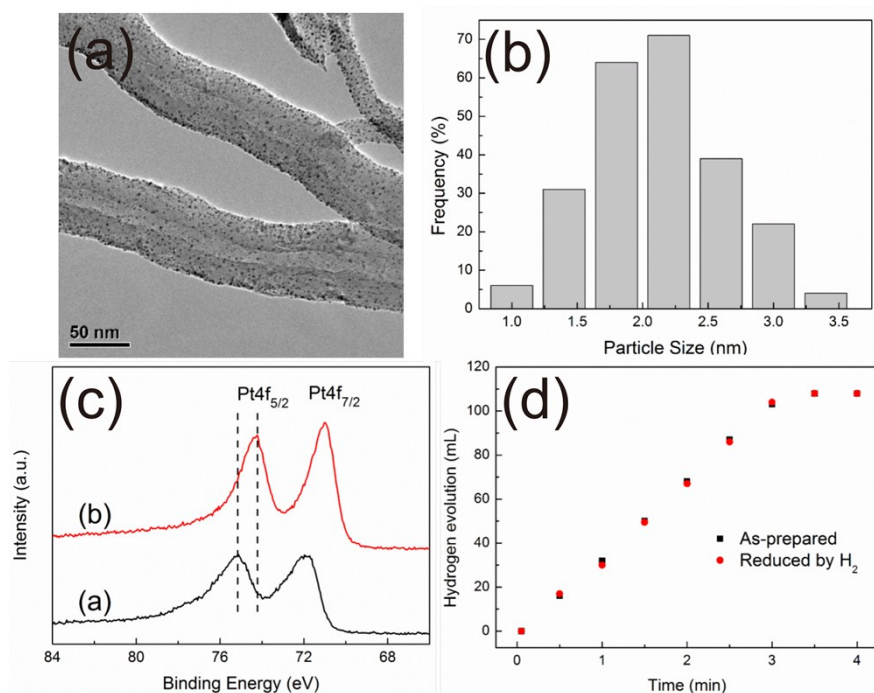

**Fig. S6.** (a) TEM image and (b) the corresponding particle size distribution of Pt20/CNTs catalysts reduced by H<sub>2</sub> at 200 °C. (c) XPS spectra of Pt4f in Pt20/CNTs catalysts before (a) and after (b) H<sub>2</sub> reduction at 200 °C. (d) The catalytic activity comparison of Pt20/CNTs catalysts before and after H<sub>2</sub> reduction.

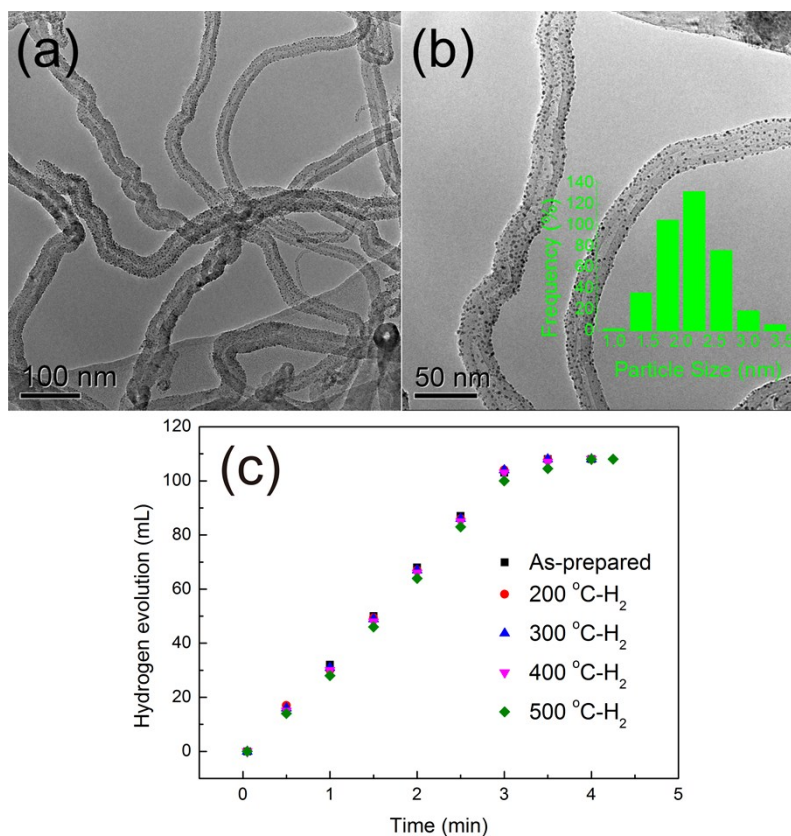

**Fig. S7** Low (a) and high (b) magnification TEM images of Pt<sub>20</sub>/CNTs catalysts reduced by H<sub>2</sub> at 400 °C (Inset in Fig. S7b: the corresponding particle size distribution of Pt nanoparticles). (c) Hydrogen generation from AB solution (0.15 mol/L, 10.0 mL) at 25 ± 0.5 °C catalyzed by the Pt<sub>20</sub>/CNTs catalysts reduced under different temperatures.



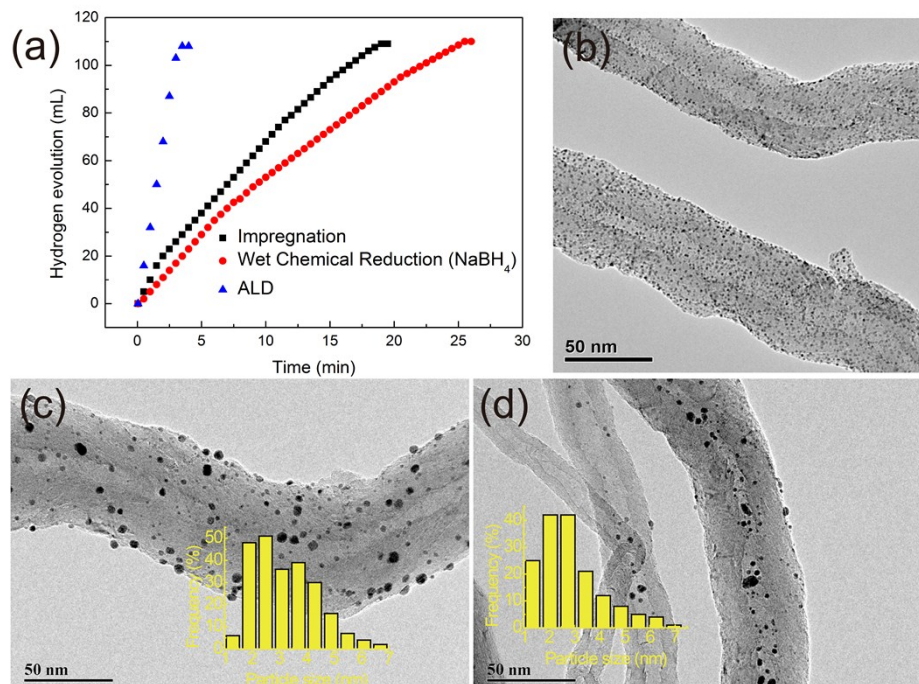

**Fig. S8** (a) Catalytic activity comparison of Pt/CNTs catalysts prepared by ALD, impregnation and wet chemical reduction, and TEM images of Pt/CNTs catalysts prepared by (b) ALD, (c) impregnation and (d) wet chemical reduction (inset in Fig S8c and S8d: the corresponding Pt nanoparticle size distribution).

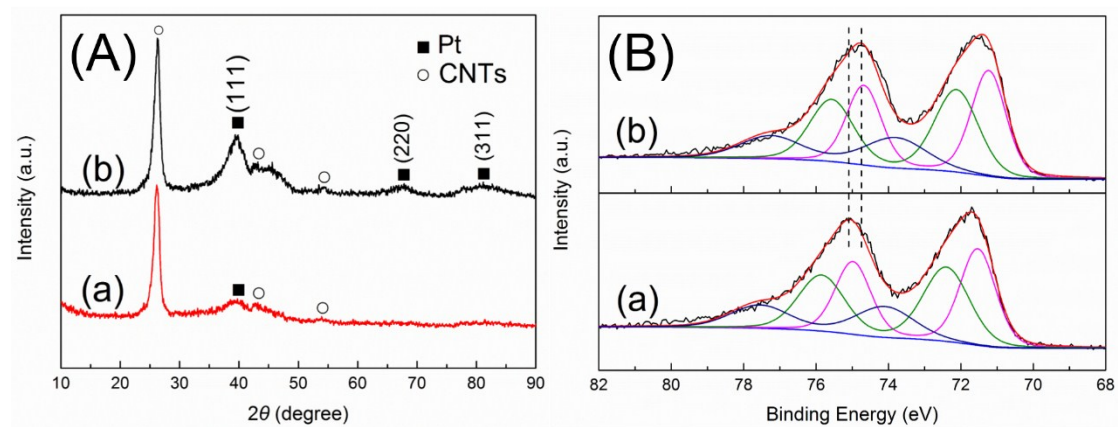

**Fig. S9** (A) XRD patterns and (B) XPS Pt4f levels of the (a) fresh and (b) deactivated Pt20/CNTs catalysts.



**Table S3** Relative content of Pt species content of the fresh and deactivated Pt20/CNTs catalysts.

| Catalysts   | Relative content (%) | B.E. (eV) | Assignment       | $\Delta$ BE (eV) <sup>a</sup> |
|-------------|----------------------|-----------|------------------|-------------------------------|
| Fresh       | 39.8                 | 71.5      | Metallic Pt      | 0                             |
|             | 39.5                 | 72.4      | Pt <sup>2+</sup> |                               |
|             | 20.7                 | 74.1      | Pt <sup>4+</sup> |                               |
| Deactivated | 40.3                 | 71.3      | Metallic Pt      | 0.3                           |
|             | 39.3                 | 72.2      | Pt <sup>2+</sup> |                               |
|             | 20.4                 | 73.7      | Pt <sup>4+</sup> |                               |

<sup>a</sup> The difference of the binding energy ( $\Delta$ BE) is calculated based the fresh Pt20/CNTs catalysts.

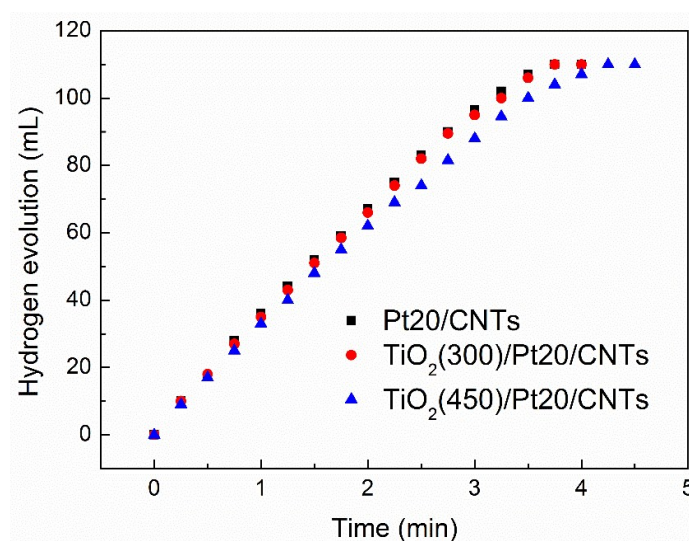

**Fig. S10** Hydrogen generation from AB solution (0.15 mol/L, 10.0 mL) catalyzed by Pt20/CNTs and calcinated TiO<sub>2</sub>(300)/Pt20/CNTs and TiO<sub>2</sub>(450)/Pt20/CNTs catalysts at 25 ± 0.5 °C.

**Table S4** Specific surface area and total pore volume of the as-prepared and calcinated TiO<sub>2</sub>/Pt20/CNTs samples.

| Sample      | S <sub>BET</sub> (m <sup>2</sup> /g) | V <sub>t</sub> (cm <sup>3</sup> /g) |
|-------------|--------------------------------------|-------------------------------------|
| As-prepared | 59.1                                 | 0.064                               |
| Calcinated  | 72.2                                 | 0.142                               |

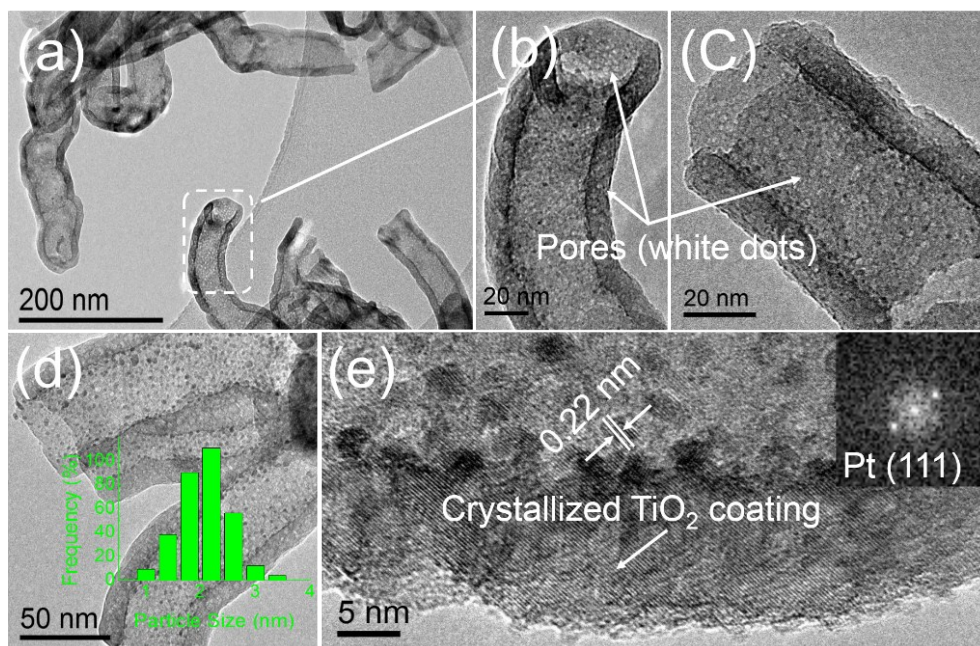

**Fig. S11** Low (a) and high magnification (b, c and d) TEM images of calcinated  $\text{TiO}_2/\text{Pt}20/\text{CNTs}$  catalysts. (e) HRTEM images of calcinated  $\text{TiO}_2/\text{Pt}20/\text{CNTs}$  catalysts. (Inset in Fig. S11d and e: the corresponding particle size distribution of the catalysts and FFT of the Pt nanoparticle; The ALD number cycle of  $\text{TiO}_2$  is 300).

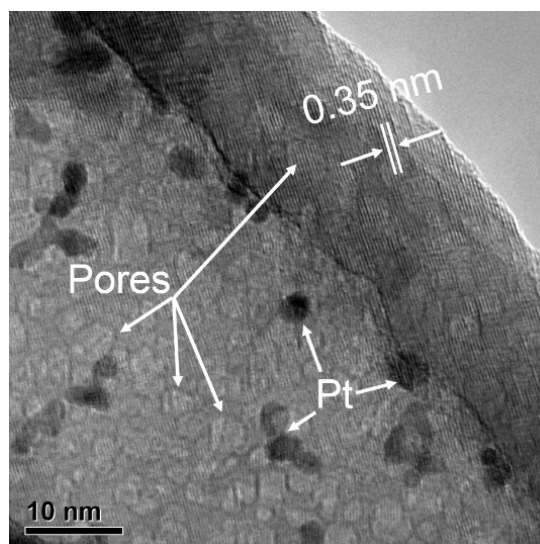

**Fig. S12** HRTEM image after ten catalytic cycles of calcinated  $\text{TiO}_2/\text{Pt}20/\text{CNTs}$  catalysts (The ALD number cycle of  $\text{TiO}_2$  is 300).
